# Supplementary material
Source: publisher site journal article supplement (https://www.dovepress.com/article/218697)
Supplement: Supplementary file 1 [file get_supplementary_file.php]

## Appendix

| Variable | Prevalence | Prevalence (%) | Dead (2012) | Mortality (%) |
| --- | --- | --- | --- | --- |
| Group I (1 p) | | | | |
| Myocardial infarction | 1515 | 1.96 | 682 | 45.0 |
| Dementia | 144 (124) | 0.19 (0.16) | 130 (113) | 90.3 (91.1) |
| Congestive Heart Failure | 1699 (779) | 2.2 (1.0) | 1161 (584) | 68.3 (75.0) |
| Peripheral vascular disease | 933 | 1.2 | 637 | 68.3 |
| Cerebrovascular disease | 3087 | 4.0 | 1460 | 47.3 |
| Chronic pulmonary disease | 6985 (961) | 9.0 (1.2) | 2592 (648) | 37.1 (67.4) |
| Rheumatologic disease | 951 (288) | 1.2 (0.37) | 351 (132) | 36.9 (45.8) |
| Peptic ulcer disease | 387 | 0.50 | 209 | 54.0 |
| Mild chronic liver disease | 237 | 0.31 | 176 | 74.3 |
| Diabetes without chronic complications | 6215 (1003) | 8.0 (1.3) | 2764 (573) | 44.5 (57.1) |
| Group II (2p) | | | | |
| Hemiplegia or paraplegia | 75 | 0.1 | 48 | 64.0 |
| Moderate or severe renal disease | 187 (157) | 0.24 (0.20) | 134 (112) | 71.7 (71.3) |
| Diabetes with chronic complications | 456 | 0.59 | 342 | 75.0 |
| Any malignancy (including leukemia and lymphoma) | 1969 (1737) | 2.5 (2.2) | 1045 (912) | 53.1 (52.5) |
| Group III (3 p) | | | | |
| Moderate or severe liver disease | 79 | 0.10 | 60 | 75.9 |
| Group IV (6 p) | | | | |
| Metastatic solid tumor | 50 | 0.06 | 41 | 82.0 |
| AIDS/HIV | 6 | 0.01 | 4 | 66.6 |
|  | | | | |
| Healthy | 57,891 | 74.8 | 12,232 | 21.1 |
| Total | 77,440 | 100 | 20,562 | 26.6 |

**Appendix 1.** Prevalence of diseases included in the Deyo’s adaptation of the Charlson Comorbidity Index based on all registries. Prevalence of disease based on the Care Registry for Health Care data only is reported in parentheses

| Disease | ICD -10 code | SII entitlement code | SII entitlements after 2000 | SII medication reimbursements (ATC code) |
| --- | --- | --- | --- | --- |
| Group I (1 p) | | | | |
| Myocardian infarction | I21.x, I22.x, I25.2 |  |  |  |
| Dementia* | F00.x–F03.x, F05.1, G30.x, G31.1 | 307 |  | N06D |
| Congestive Heart Failure* | I09.9, I11.0, I13.0, I13.2, I25.5, I42.0, I42.5–I42.9, I43.x, I50.x, P29.0 | 201 | 283, 354 |  |
| Peripheral vascular disease | I70.x, I71.x, I73.1, I73.8, I73.9, I77.1, I79.0, I79.2, K55.1, K55.8, K55.9, Z95.8, Z95.9 |  |  |  |
| Cerebrovascular disease | G45.x, G46.x, H34.0, I60.x–I69.x |  |  | B01AC30, B01AC07 |
| Chronic Pulmonary Disease* | I27.8, I27.9, J40.x–J47.x, J60.x–J67.x, J68.4, J70.1, J70.3 | 203, 304 | 284, 344, 348, 356 | R03BA, R03BB, R03BC, R03AL02, R03AL05, R03DA, R03AK, R03DX, B02AB02 |
| Rheumatologic disease* | M05.x, M06.x, M31.5, M32.x–M34.x, M35.1, M35.3, M36.0 | 202, 281 | 313 | L04AA24, M01CB, L04AC07 |
| Peptic ulcer disease | K25.x–K28.x |  |  |  |
| Mild chronic liver disease* | B18.x, K70.0–K70.3, K70.9, K71.3–K71.5, K71.7, K73.x, K74.x, K76.0, K76.2–K76.4, K76.8, K76.9, Z94.4 |  |  |  |
| Diabetes without chronic complications | E10.0, E10.1, E10.6, E10.8, E10.9, E11.0, E11.1, E11.6, E11.8, E11.9, E12.0, E12.1, E12.6, E12.8, E12.9, E13.0, E13.1, E13.6, E13.8, E13.9, E14.0, E14.1, E14.6, E14.8, E14.9 | 103 | 160, 171, 346, 371 | A10 |
| Group II (2 p) | | | | |
| Hemiplegia or paraplegia* | G04.1, G11.4, G80.1, G80.2, G81.x, G82.x, G83.0–G83.4, G83.9 |  |  |  |
| Moderate or severe renal disease* | I12.0, I13.1, N03.2–N03.7, N05.2– N05.7, N18.x, N19.x, N25.0, Z49.0– Z49.2, Z94.0, Z99.2 | 137, 138 | 320 |  |
| Diabetes with chronic complications* | E10.2–E10.5, E10.7, E11.2–E11.5, E11.7, E12.2–E12.5, E12.7, E13.2– E13.5, E13.7, E14.2–E14.5, E14.7 |  |  |  |
| Any malignancy (including leukemia and lymphoma)* | C00.x–C26.x, C30.x–C34.x, C37.x– C41.x, C43.x, C45.x–C58.x, C60.x– C76.x, C81.x–C85.x, C88.x, C90.x–C97.x | 115, 116, 128, 130, 180, 184,185, 302, 312 | 150, 152, 153, 155, 156, 158, 159, 163, 166, 167, 168, 169, 170, 180, 191, 192, 197, 198, 323, 324, 325, 328, 329, 335, 337, 341, 343, 352, 360, 361, 363, 369, 370, 372, 373 |  |
| Group III (3 p) | | | | |
| Moderate or severe liver disease* | I85.0, I85.9, I86.4, I98.2, K70.4, K71.1, K72.1, K72.9, K76.5, K76.6, K76.7 |  |  |  |
| Group IV (6 p) | | | | |
| Metastatic solid tumor* | C77.x–C80.x |  |  |  |
| AIDS/HIV* | B20.x–B22.x, B24.x |  |  |  |

**Appendix 2.** ICD-10 codes, Social Security Institution (SII) entitlement and medication reimbursement codes used to calculate Deyo’s adaptation of the Charlson Comorbidity Index. Diseases included in Quan’s adaptation are marked with asterisk (*)
